# Supplementary material for: A rapid prototyping method for polymer microfluidics with fixed aspect ratio and 3D tapered channels
Source: Royal Society of Chemistry journal article supplement (doi:10.1039/b903755a), 2009-01-01
Supplement: b903755a.pdf [file b903755a.pdf]

**Supplemental Table 1:** Embossing conditions for various polymers used in this rapid prototyping scheme.

| Polymer                   | Embossing Temperature | Embossing Pressure | Embossing Duration |
|---------------------------|-----------------------|--------------------|--------------------|
| Polysulfone (UDEL, P1700) | 200°C                 | 1 Ton              | 10 minutes         |
| Polycarbonate             | 170°C                 |                    |                    |
| Cyclic Olefin Copolymer   | 155°C                 |                    |                    |
| PMMA (Optix Acrylic)      | 120°C                 |                    |                    |

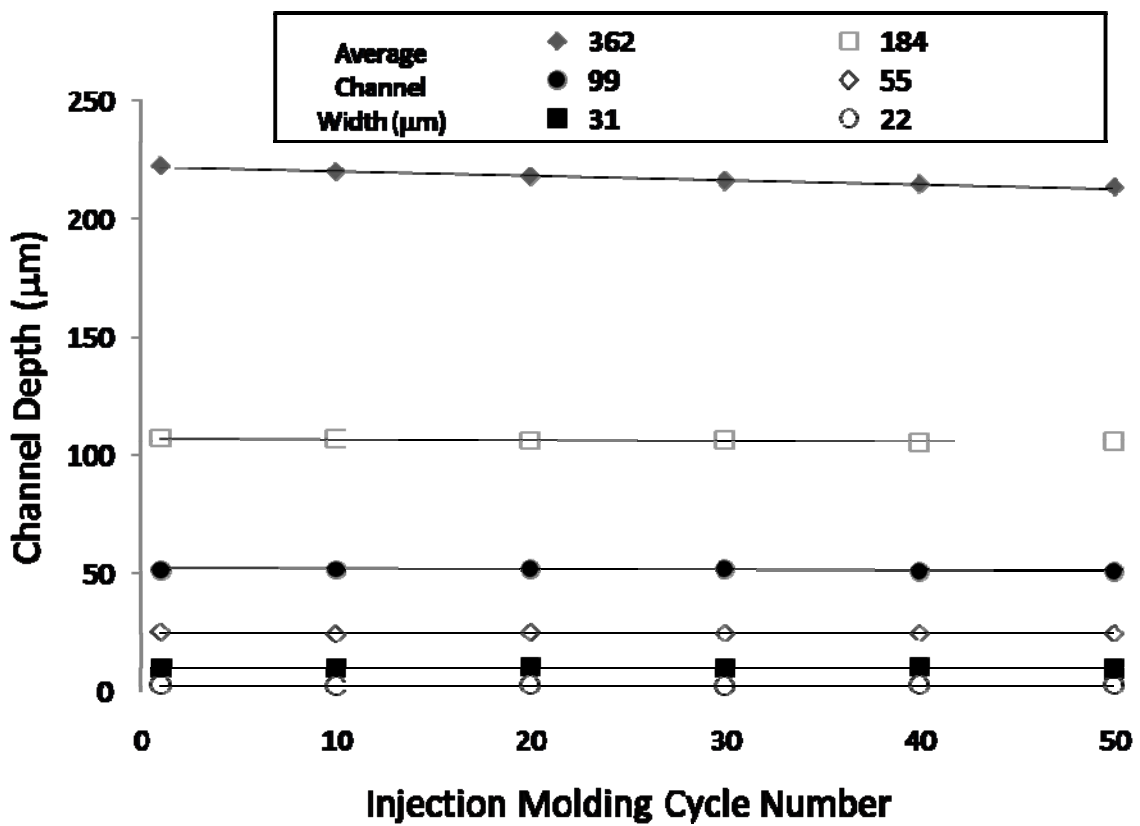

**Supplemental Fig. 1** Replication variability. Channel depths for each injection molded COC replica plotted over multiple injection molding cycles. Very little variability is apparent for each channel width.
